# Supplementary material for: The low level of plastome differentiation observed in some lineages of Poales hinders molecular species identification
Source: Front Plant Sci. 2023 Dec 8;14:1275377. doi: 10.3389/fpls.2023.1275377 (PMC10739336; doi:10.3389/fpls.2023.1275377)
Supplement: Supplementary file 2 [file Table_1.xlsx]

## Sheet: Supplementary Table S1
Supplementary Material
The low level of plastome differentiation observed within feather grasses (Stipa L.) is no exception in Poales
Katarzyna Krawczyk*, Łukasz Paukszto, Mateusz Maździarz, Jakub Sawicki
* Correspondence: Katarzyna Krawczyk: katarzyna.krawczyk@uwm.edu.pl
Table S1 GeneBank accession numbers of sequences used in the study
JQ740834.1_Aegilops.speltoides
JQ754651.1_Aegilops.tauschii
KF534489.1_Aegilops.cylindrica
KF534490.1_Aegilops.geniculata
KJ614404.1_Aegilops.speltoides
KJ614405.1_Aegilops.speltoides
KJ614406.1_Aegilops.speltoides
KJ614412.1_Aegilops.tauschii
KJ614413.1_Aegilops.searsii
KJ614414.1_Aegilops.searsii
KJ614415.1_Aegilops.searsii
KJ614416.1_Aegilops.longissima
KJ614417.1_Aegilops.sharonensis
KJ614418.1_Aegilops.bicornis
KJ614419.1_Aegilops.sharonensis
KJ614420.1_Aegilops.kotschyi
KU198481.1_Aegilops.tauschii
KU198482.1_Aegilops.tauschii
KU198483.1_Aegilops.tauschii
KU198484.1_Aegilops.tauschii
KU198485.1_Aegilops.tauschii
KU198486.1_Aegilops.tauschii
KU207222.1_Aegilops.tauschii
KU207223.1_Aegilops.tauschii
KU207224.1_Aegilops.cylindrica
KU207225.1_Aegilops.tauschii
KU207226.1_Aegilops.cylindrica
KY635999.1_Aegilops.bicornis
KY636000.1_Aegilops.bicornis
KY636001.1_Aegilops.bicornis
KY636002.1_Aegilops.bicornis
KY636003.1_Aegilops.biuncialis
KY636004.1_Aegilops.biuncialis
KY636005.1_Aegilops.biuncialis
KY636006.1_Aegilops.biuncialis
KY636007.1_Aegilops.columnaris
KY636008.1_Aegilops.columnaris
KY636009.1_Aegilops.comosa
KY636010.1_Aegilops.comosa
KY636011.1_Aegilops.comosa
KY636012.1_Aegilops.comosa
KY636013.1_Aegilops.crassa
KY636014.1_Aegilops.crassa
KY636015.1_Aegilops.crassa
KY636016.1_Aegilops.cylindrica
KY636017.1_Aegilops.cylindrica
KY636018.1_Aegilops.geniculata
KY636019.1_Aegilops.geniculata
KY636020.1_Aegilops.geniculata
KY636021.1_Aegilops.juvenalis
KY636022.1_Aegilops.juvenalis
KY636023.1_Aegilops.kotschyi
KY636024.1_Aegilops.longissima
KY636025.1_Aegilops.longissima
KY636026.1_Aegilops.longissima
KY636027.1_Aegilops.longissima
KY636028.1_Aegilops.longissima
KY636029.1_Aegilops.markgrafii
KY636030.1_Aegilops.markgrafii
KY636031.1_Aegilops.markgrafii
KY636032.1_Aegilops.markgrafii
KY636033.1_Aegilops.markgrafii
KY636034.1_Aegilops.neglecta
KY636035.1_Aegilops.neglecta
KY636036.1_Aegilops.neglecta
KY636037.1_Aegilops.neglecta
KY636038.1_Aegilops.peregrina
KY636039.1_Aegilops.searsii
KY636040.1_Aegilops.searsii
KY636041.1_Aegilops.searsii
KY636042.1_Aegilops.searsii
KY636043.1_Aegilops.sharonensis
KY636044.1_Aegilops.speltoides
KY636045.1_Aegilops.speltoides
KY636046.1_Aegilops.speltoides
KY636047.1_Aegilops.speltoides
KY636048.1_Aegilops.speltoides
KY636049.1_Aegilops.speltoides
KY636050.1_Aegilops.tauschii
KY636051.1_Aegilops.tauschii
KY636052.1_Aegilops.tauschii
KY636053.1_Aegilops.tauschii
KY636054.1_Aegilops.triuncialis
KY636055.1_Aegilops.triuncialis
KY636056.1_Aegilops.umbellulata
KY636057.1_Aegilops.umbellulata
KY636058.1_Aegilops.umbellulata
KY636059.1_Aegilops.umbellulata
KY636060.1_Aegilops.uniaristata
KY636061.1_Aegilops.uniaristata
KY636062.1_Aegilops.uniaristata
KY636063.1_Aegilops.ventricosa
KY636064.1_Aegilops.ventricosa
MG958544.1_Aegilops.tauschii
MG958547.1_Aegilops.umbellulata
MG958548.1_Aegilops.comosa
MG958549.1_Aegilops.longissima
MG958553.1_Aegilops.speltoides
MN223975.1_Aegilops.tauschii
MN223976.1_Aegilops.tauschii
MN223977.1_Aegilops.tauschii
MN223978.1_Aegilops.tauschii
MN258078.1_Aegilops.tauschii
MN258079.1_Aegilops.tauschii
MN258080.1_Aegilops.tauschii
MN258081.1_Aegilops.tauschii
MN258082.1_Aegilops.tauschii
MN258083.1_Aegilops.tauschii
MN258084.1_Aegilops.tauschii
MN258085.1_Aegilops.tauschii
MN258086.1_Aegilops.tauschii
MN258087.1_Aegilops.tauschii
MN258088.1_Aegilops.tauschii
MN258089.1_Aegilops.tauschii
MN258090.1_Aegilops.tauschii
KY126307.1_Agropyron.cristatum
KY636067.1_Agropyron.cristatum
MH285848.1_Agropyron.mongolicum
MN703653.1_Agropyron.cristatum
MN703654.1_Agropyron.cristatum
MN703655.1_Agropyron.cristatum
MN703656.1_Agropyron.cristatum
MN703657.1_Agropyron.cristatum
MN703668.1_Agropyron.cristatum
MN703671.1_Agropyron.cristatum
MN703672.1_Agropyron.cristatum
MW309818.1_Agropyron.desertorum
EF115543.1_Agrostis.stolonifera
MF460976.1_Agrostis.gigantea
MW143240.1_Agrostis.capillaris
MF035966.1_Alloeochaete.namuliensis
MF035967.1_Alloeochaete.oreogena
MF035968.1_Alloeochaete.uluguruensis
CM014279.1_Alloteropsis.semialata
KT281145.1_Alloteropsis.semialata
KT281146.1_Alloteropsis.angusta
KT281147.1_Alloteropsis.semialata
KT281148.1_Alloteropsis.semialata
KT281149.1_Alloteropsis.semialata
KT281150.1_Alloteropsis.semialata
KT281151.1_Alloteropsis.semialata
KT281152.1_Alloteropsis.semialata
KT281153.1_Alloteropsis.semialata
KT281154.1_Alloteropsis.semialata
KT281155.1_Alloteropsis.semialata
KT281156.1_Alloteropsis.cimicina
KT281157.1_Alloteropsis.semialata
KX752083.1_Alloteropsis.semialata
KX752084.1_Alloteropsis.semialata
KX752085.1_Alloteropsis.semialata
KX752086.1_Alloteropsis.semialata
KX752087.1_Alloteropsis.semialata
KX752088.1_Alloteropsis.semialata
KX752089.1_Alloteropsis.paniculata
KX752090.1_Alloteropsis.angusta
MT950759.1_Alloteropsis.semialata
MT950760.1_Alloteropsis.cimicina
MF460977.1_Alopecurus.arundinaceus
MN422306.1_Alopecurus.aequalis
MN422307.1_Alopecurus.japonicus
KJ496369.1_Ampelocalamus.calcareus
KX372537.1_Ampelocalamus.naibunensis
MF066245.1_Ampelocalamus.actinotrichus
MH410123.1_Ampelocalamus.actinotrichus
MH988715.1_Ampelocalamus.calcareus
MH988717.1_Ampelocalamus.saxatilis
MK393372.1_Ampelocalamus.saxatilis
MH988718.1_Ampelocalamus.melicoideus
MK393365.1_Ampelocalamus.breviligulatus
MK393366.1_Ampelocalamus.hirsutissimus
MK393367.1_Ampelocalamus.luodianensis
MK393368.1_Ampelocalamus.melicoideus
MK393369.1_Ampelocalamus.microphyllus
MK393370.1_Ampelocalamus.patellaris
MK393371.1_Ampelocalamus.scandens
MK393373.1_Ampelocalamus.yongshanensis
MK393374.1_Ampelocalamus.mianningensis
MT380008.1_Ampelocalamus.scandens
MT517441.1_Ampelocalamus.scandens
KY596118.1_Andropogon.fastigiatus
KY596121.1_Andropogon.chinensis
KY596126.1_Andropogon.chinensis
KY596133.1_Andropogon.chinensis
KY596144.1_Andropogon.fastigiatus
KY596148.1_Andropogon.abyssinicus
KY596152.1_Andropogon.fastigiatus
KY596164.1_Andropogon.burmanicus
KY596167.1_Andropogon.burmanicus
KY596170.1_Andropogon.distachyos
KY596180.1_Andropogon.fastigiatus
LT996916.1_Andropogon.virginicus
MH181163.1_Andropogon.insolitus
MH181165.1_Andropogon.gerardi
MH181168.1_Andropogon.schirensis
MH181171.1_Andropogon.gyrans
MH181172.1_Andropogon.ingratus
MH181173.1_Andropogon.appendiculatus
MH181174.1_Andropogon.gayanus
MH181175.1_Andropogon.pusillus
MH181176.1_Andropogon.greenwayi
MH181177.1_Andropogon.greenwayi
MH181178.1_Andropogon.gerardi
MH181180.1_Andropogon.huillensis
MH181181.1_Andropogon.chrysostachyus
MH181182.1_Andropogon.laxatus
MH181184.1_Andropogon.abyssinicus
MH181185.1_Andropogon.glaucescens
MH181186.1_Andropogon.heterantherus
MH181187.1_Andropogon.abyssinicus
MH181188.1_Andropogon.ascinodis
MH181191.1_Andropogon.gracilis
MH181193.1_Andropogon.fastigiatus
MH181194.1_Andropogon.crossotos
MH181197.1_Andropogon.gracilis
MH181198.1_Andropogon.chrysostachyus
MH181200.1_Andropogon.brachystachyus
MH181203.1_Andropogon.distachyos
MH181204.1_Andropogon.ligulatus
MH181206.1_Andropogon.laxatus
MH181210.1_Andropogon.leprodes
MH181211.1_Andropogon.gayanus
MH181212.1_Andropogon.brazzae
MH181213.1_Andropogon.selloanus
MH181215.1_Andropogon.munroi
MH181216.1_Andropogon.mohrii
MH181217.1_Andropogon.reedii
MH181218.1_Andropogon.aequatoriensis
MH181221.1_Andropogon.floridanus
MH181222.1_Andropogon.gerardi
MH181223.1_Andropogon.virgatus
MH181224.1_Andropogon.canaliculatus
MH181225.1_Andropogon.schirensis
MH181230.1_Andropogon.urbanianus
MH181231.1_Andropogon.mannii
MH181232.1_Andropogon.liebmannii
MH181236.1_Andropogon.brazzae
MH181237.1_Andropogon.mannii
MH660710.1_Andropogon.ivorensis
MT610078.1_Andropogon.fastigiatus
MT610095.1_Andropogon.eucomus
MT942631.1_Andropogon.hallii
KJ920224.1_Aristida.purpurea
MF460978.1_Aristida.ternipes
MF563384.1_Aristida.rufescens
MK570613.1_Aristida.behriana
MK570614.1_Aristida.stipitata
MK570615.1_Aristida.congesta
MK570616.1_Aristida.diffusa
MK570617.1_Aristida.glaziovii
MK590083.1_Aristida.pruinosa
MT083935.1_Aristida.adscensionis
OK149242.1_Aristida.adscensionis
KU291471.1_Arthraxon.prionodes
KY596127.1_Arthraxon.lanceolatus
KY596138.1_Arthraxon.prionodes
KY596179.1_Arthraxon.hispidus
KY596183.1_Arthraxon.microphyllus
KY596185.1_Arthraxon.lanceolatus
MT113359.1_Arthraxon.lancifolius
JX235347.1_Arundinaria.gigantea
JX513413.1_Arundinaria.fargesii
KC817462.1_Arundinaria.appalachiana
KC817463.1_Arundinaria.tecta
MF508721.1_Arundinaria.humbertii
MH988716.1_Arundinaria.fargesii
KU291490.1_Arundinella.deppeana
MK593543.1_Arundinella.hirta
MK593544.1_Arundinella.hookeri
MK593545.1_Arundinella.nepalensis
MT610047.1_Arundinella.nepalensis
KX109945.1_Arundo.donax
KX109946.1_Arundo.plinii
MF035971.1_Arundo.donax
MF035972.1_Arundo.donax
MW013315.1_Arundo.formosana
MZ620725.1_Arundo.formosana
KM974733.1_Avena.sativa
KX756180.1_Avena.sterilis
MG674209.1_Avena.insularis
MG687291.1_Avena.eriantha
MG687292.1_Avena.hybrida
MG687293.1_Avena.abyssinica
MG687294.1_Avena.agadiriana
MG687295.1_Avena.lusitanica
MG687296.1_Avena.wiestii
MG687297.1_Avena.canariensis
MG687298.1_Avena.maroccana
MG687299.1_Avena.atlantica
MG687300.1_Avena.hispanica
MG687301.1_Avena.ventricosa
MG687302.1_Avena.damascena
MG687303.1_Avena.clauda
MG687304.1_Avena.vaviloviana
MG687305.1_Avena.longiglumis
MG687306.1_Avena.nuda
MG687307.1_Avena.fatua
MG687308.1_Avena.sterilis
MG687309.1_Avena.strigosa
MG687310.1_Avena.brevis
MG687311.1_Avena.barbata
MG687312.1_Avena.murphyi
MG687313.1_Avena.sativa
MG687314.1_Avena.occidentalis
MK336388.1_Avena.wiestii
MK336389.1_Avena.nuda
MK336390.1_Avena.murphyi
MK336391.1_Avena.longiglumis
MK336392.1_Avena.hirtula
MK336393.1_Avena.brevis
MK336394.1_Avena.atlantica
MK336395.1_Avena.eriantha
MK336396.1_Avena.ventricosa
MK336397.1_Avena.strigosa
MK336398.1_Avena.sativa
MW784232.1_Avena.chinensis
KU291491.1_Axonopus.fissifolius
MF563383.1_Axonopus.ramosus
MN989413.1_Axonopus.compressus
FJ970915.1_Bambusa.oldhamii
HQ337797.1_Bambusa.emeiensis
KJ722536.1_Bambusa.multiplex
KJ870988.1_Bambusa.bambos
KJ870989.1_Bambusa.arnhemica
MH410121.1_Bambusa.ventricosa
MK679773.1_Bambusa.teres
MK679776.1_Bambusa.boniopsis
MK679792.1_Bambusa.oliveriana
MK679795.1_Bambusa.cornigera
MK679797.1_Bambusa.odashimae
MK679798.1_Bambusa.bicicatricata
MK679799.1_Bambusa.basihirsuta
MK679800.1_Bambusa.flexuosa
MK679801.1_Bambusa.rutila
MK679806.1_Bambusa.vulgaris
MK679807.1_Bambusa.sinospinosa
MN038143.1_Bambusa.variostriata
MN688610.1_Bambusa.pervariabilis
MT028547.1_Bambusa.tulda
MT648824.1_Bambusa.rigida
MT843581.1_Bambusa.beecheyana
MW190087.1_Bambusa.lapidea
MW190088.1_Bambusa.contracta
MW463057.1_Bambusa.intermedia
MW540515.1_Bambusa.stenoaurita
MW544010.1_Bambusa.vulgaris
MW557324.1_Bambusa.albolineata
KU291492.1_Bothriochloa.alta
MH660709.1_Bothriochloa.decipiens
MT610049.1_Bothriochloa.bladhii
MW699899.1_Bothriochloa.ischaemum
EU325680.1_Brachypodium.distachyon
KU170609.1_Brachypodium.distachyon
LR537446.1_Brachypodium.distachyon
LR537447.1_Brachypodium.distachyon
LR537448.1_Brachypodium.distachyon
LR537449.1_Brachypodium.distachyon
LR537450.1_Brachypodium.distachyon
LR537451.1_Brachypodium.distachyon
LR537452.1_Brachypodium.distachyon
LR537453.1_Brachypodium.distachyon
LR537454.1_Brachypodium.distachyon
LR537455.1_Brachypodium.distachyon
LR537456.1_Brachypodium.distachyon
LR537457.1_Brachypodium.distachyon
LR537458.1_Brachypodium.distachyon
LR537459.1_Brachypodium.distachyon
LR537460.1_Brachypodium.distachyon
LR537461.1_Brachypodium.distachyon
LR537462.1_Brachypodium.distachyon
LR537463.1_Brachypodium.distachyon
LR537464.1_Brachypodium.distachyon
LR537465.1_Brachypodium.distachyon
LR537466.1_Brachypodium.distachyon
LR537467.1_Brachypodium.distachyon
LR537468.1_Brachypodium.distachyon
LR537469.1_Brachypodium.distachyon
LR537470.1_Brachypodium.distachyon
LR537471.1_Brachypodium.distachyon
LR537472.1_Brachypodium.distachyon
LR537473.1_Brachypodium.distachyon
LR537474.1_Brachypodium.distachyon
LR537475.1_Brachypodium.distachyon
LR537476.1_Brachypodium.distachyon
LR537477.1_Brachypodium.distachyon
LR537478.1_Brachypodium.distachyon
LR537479.1_Brachypodium.distachyon
LR537480.1_Brachypodium.distachyon
LR537481.1_Brachypodium.distachyon
LR537482.1_Brachypodium.distachyon
LR537483.1_Brachypodium.distachyon
LR537484.1_Brachypodium.distachyon
LR537485.1_Brachypodium.distachyon
LR537486.1_Brachypodium.distachyon
LR537487.1_Brachypodium.distachyon
LR537488.1_Brachypodium.distachyon
LR537489.1_Brachypodium.distachyon
LR537490.1_Brachypodium.distachyon
LR537491.1_Brachypodium.distachyon
LR537492.1_Brachypodium.distachyon
LR537493.1_Brachypodium.distachyon
LR537494.1_Brachypodium.distachyon
LR537495.1_Brachypodium.distachyon
LR537496.1_Brachypodium.distachyon
LR537497.1_Brachypodium.distachyon
LR537498.1_Brachypodium.distachyon
LR537499.1_Brachypodium.distachyon
LR537500.1_Brachypodium.distachyon
LR537501.1_Brachypodium.distachyon
LR537502.1_Brachypodium.distachyon
LR537503.1_Brachypodium.distachyon
LR537504.1_Brachypodium.hybridum
LR537505.1_Brachypodium.hybridum
LR537506.1_Brachypodium.hybridum
LR537507.1_Brachypodium.hybridum
LR537508.1_Brachypodium.hybridum
LR537509.1_Brachypodium.hybridum
LR537510.1_Brachypodium.hybridum
LT222229.1_Brachypodium.distachyon
LT222230.1_Brachypodium.hybridum
LT558582.1_Brachypodium.distachyon
LT558583.1_Brachypodium.distachyon
LT558584.1_Brachypodium.distachyon
LT558585.1_Brachypodium.distachyon
LT558586.1_Brachypodium.distachyon
LT558587.1_Brachypodium.distachyon
LT558588.1_Brachypodium.distachyon
LT558589.1_Brachypodium.stacei
LT558590.1_Brachypodium.distachyon
LT558591.1_Brachypodium.distachyon
LT558592.1_Brachypodium.distachyon
LT558593.1_Brachypodium.distachyon
LT558594.1_Brachypodium.distachyon
LT558595.1_Brachypodium.distachyon
LT558596.1_Brachypodium.distachyon
LT558597.1_Brachypodium.distachyon
LT558598.1_Brachypodium.distachyon
LT558599.1_Brachypodium.distachyon
LT558600.1_Brachypodium.distachyon
LT558601.1_Brachypodium.distachyon
LT558602.1_Brachypodium.distachyon
LT558603.1_Brachypodium.distachyon
LT558604.1_Brachypodium.distachyon
LT558605.1_Brachypodium.distachyon
LT558606.1_Brachypodium.distachyon
LT558607.1_Brachypodium.distachyon
LT558608.1_Brachypodium.distachyon
LT558609.1_Brachypodium.distachyon
LT558610.1_Brachypodium.distachyon
LT558611.1_Brachypodium.distachyon
LT558612.1_Brachypodium.distachyon
LT558613.1_Brachypodium.distachyon
LT558614.1_Brachypodium.distachyon
LT558615.1_Brachypodium.distachyon
LT558616.1_Brachypodium.distachyon
LT558617.1_Brachypodium.distachyon
LT558618.1_Brachypodium.distachyon
LT558619.1_Brachypodium.distachyon
LT558620.1_Brachypodium.distachyon
LT558621.1_Brachypodium.distachyon
LT558622.1_Brachypodium.distachyon
LT558623.1_Brachypodium.distachyon
LT558624.1_Brachypodium.hybridum
LT558625.1_Brachypodium.distachyon
LT558626.1_Brachypodium.distachyon
LT558627.1_Brachypodium.distachyon
LT558628.1_Brachypodium.distachyon
LT558629.1_Brachypodium.distachyon
LT558630.1_Brachypodium.distachyon
LT558631.1_Brachypodium.distachyon
LT558632.1_Brachypodium.distachyon
LT558633.1_Brachypodium.distachyon
LT558634.1_Brachypodium.distachyon
LT558635.1_Brachypodium.distachyon
LT558636.1_Brachypodium.distachyon
MT094311.1_Brachypodium.pinnatum
MT712787.1_Brachypodium.distachyon
MZ043779.1_Brachypodium.sylvaticum
KM974737.1_Bromus.vulgaris
MW013316.1_Bromus.catharticus
MW861351.1_Bromus.inermis
MZ620726.1_Bromus.catharticus
MG673520.1_Campeiostachys.nutans
MN895932.1_Campeiostachys.dahurica
MT385865.1_Campeiostachys.nutans
MT385866.1_Campeiostachys.nutans
MT610375.1_Campeiostachys.nutans
MT644141.1_Campeiostachys.nutans
MT644144.1_Campeiostachys.kamoji
MT644145.1_Campeiostachys.purpuraristata
MT644147.1_Campeiostachys.dahurica
MT644148.1_Campeiostachys.dahurica
MT644149.1_Campeiostachys.dahurica
MT644150.1_Campeiostachys.dahurica
MT937179.1_Campeiostachys.kamoji
MW043483.1_Campeiostachys.kamoji
KU238086.1_Carex_neurocarpa
MT795185.1_Carex_agglomerata
MZ846224.1_Carex_laevissima
MZ962720.1_Carex_myosuroides
KP751906.1_Carex_siderosticta
KJ490012.1_Cenchrus.americanus
KX756179.1_Cenchrus.americanus
MF594682.1_Cenchrus.purpureus
MH286942.1_Cenchrus.ciliaris
MH488956.1_Cenchrus.purpureus
MN078360.1_Cenchrus.echinatus
MN078361.1_Cenchrus.longispinus
MN180104.1_Cenchrus.americanus
MW421597.1_Cenchrus.centrasiaticus
MW442087.1_Cenchrus.flaccidus
MW816925.1_Cenchrus.compressus
MW816926.1_Cenchrus.polystachios
MW816927.1_Cenchrus.clandestinus
MF066244.1_Chimonobambusa.tumidissinoda
MT576658.1_Chimonobambusa.hirtinoda
MT884004.1_Chimonobambusa.hejiangensis
MT941921.1_Chimonobambusa.sichuanensis
MW030500.1_Chimonobambusa.purpurea
MW186792.1_Chimonobambusa.hejiangensis
OK040768.1_Chimonobambusa.angustifolia
OK040769.1_Chimonobambusa.utilis
OK046142.1_Chimonobambusa.hirtinoda
KT168393.1_Chloris.barbata
KX765278.1_Chloris.truncata
KX765279.1_Chloris.virgata
MW020353.1_Chloris.virgata
MZ620727.1_Chloris.virgata
OL678517.1_Chloris.virgata
KU961864.1_Chrysopogon.serrulatus
KY596158.1_Chrysopogon.zizanioides
KY596161.1_Chrysopogon.gryllus
KY596177.1_Chrysopogon.orientalis
KY610123.1_Chrysopogon.zizanioides
KY610124.1_Chrysopogon.zizanioides
MN974486.1_Chrysopogon.aciculatus
KJ870990.1_Chusquea.spectabilis
KJ871001.1_Chusquea.liebmannii
KP319241.1_Chusquea.circinata
KP319242.1_Chusquea.sp..PFM-2015
MH410122.1_Chusquea.culeou
MK622398.1_Cleistogenes.sp..BM-2019
MW194081.1_Cleistogenes.sp..XJQ-2021
MW194082.1_Cleistogenes.caespitosa
MW194083.1_Cleistogenes.caespitosa
MW194084.1_Cleistogenes.chinensis
MW194085.1_Cleistogenes.festucacea
MW194086.1_Cleistogenes.gracilis
MW194087.1_Cleistogenes.hackelii
MW194088.1_Cleistogenes.hackelii
MW194089.1_Cleistogenes.hancei
MW194090.1_Cleistogenes.polyphylla
MW194091.1_Cleistogenes.songorica
MW194092.1_Cleistogenes.squarrosa
KY596169.1_Cymbopogon.flexuosus
MH488954.1_Cymbopogon.citratus
MK593547.1_Cymbopogon.citratus
MT083936.1_Cymbopogon.distans
MT504965.1_Cymbopogon.densiflorus
MT504966.1_Cymbopogon.obtectus
MT504967.1_Cymbopogon.pospischilii
MT504968.1_Cymbopogon.schoenanthus
MT610051.1_Cymbopogon.martinii
MK423990.1_Cyperus.glomeratus
MK423991.1_Cyperus.difformis
MK431855.1_Cyperus.fuscus
MT473237.1_Cyperus.rotundus
MT937176.1_Cyperus.rotundus
MT937178.1_Cyperus.aromaticus
MW123055.1_Cyperus.exaltatus
MW123056.1_Cyperus.iria
MW542207.1_Cyperus.esculentus
KJ920229.1_Danthonia.californica
MN955297.1_Danthonia.spicata
MT083937.1_Danthonia.decumbens
FJ970916.1_Dendrocalamus.latiflorus
MK679767.1_Dendrocalamus.hamiltonii
MK679768.1_Dendrocalamus.sinicus
MK679769.1_Dendrocalamus.barbatus
MK679770.1_Dendrocalamus.semiscandens
MK679772.1_Dendrocalamus.birmanicus
MK679774.1_Dendrocalamus.giganteus
MK679775.1_Dendrocalamus.pachystachyus
MK679777.1_Dendrocalamus.minor
MK679778.1_Dendrocalamus.barbatus
MK679780.1_Dendrocalamus.sapidus
MK679781.1_Dendrocalamus.pulverulentus
MK679782.1_Dendrocalamus.ovatus
MK679783.1_Dendrocalamus.sikkimensis
MK679784.1_Dendrocalamus.yunnanicus
MK679785.1_Dendrocalamus.bambusoides
MK679786.1_Dendrocalamus.brandisii
MK679787.1_Dendrocalamus.fugongensis
MK679789.1_Dendrocalamus.membranaceus
MK679791.1_Dendrocalamus.minor
MK679802.1_Dendrocalamus.strictus
MK962316.1_Dendrocalamus.sinicus
MN782325.1_Dendrocalamus.brandisii
MN782326.1_Dendrocalamus.yunnanicus
MW054656.1_Dendrocalamus.latiflorus
MZ681865.1_Dendrocalamus.farinosus
KY596128.1_Dichanthium.sericeum
MH488955.1_Dichanthium.annulatum
MK593549.1_Dichanthium.aristatum
MT610067.1_Dichanthium.annulatum
MT942627.1_Dichanthium.sericeum
KJ513091.1_Digitaria.exilis
MK593550.1_Digitaria.glauca
MT083940.1_Digitaria.californica
OK637269.1_Digitaria.sanguinalis
KJ000047.1_Echinochloa.crus-galli
KJ000048.2_Echinochloa.oryzicola
KR822684.1_Echinochloa.crus-galli
KR822685.1_Echinochloa.crus-galli
KR822686.1_Echinochloa.crus-galli
KT983255.1_Echinochloa.colona
KT983256.1_Echinochloa.crus-galli
KU242342.1_Echinochloa.frumentacea
KX756178.1_Echinochloa.esculenta
KX870853.1_Echinochloa.colona
KX870854.1_Echinochloa.colona
MF563380.1_Echinochloa.ugandensis
MF563381.1_Echinochloa.stagnina
MW672445.1_Echinochloa.haploclada
KY432808.1_Ehrharta.bulbosa
MT083941.1_Ehrharta.longifolia
MW013317.1_Ehrharta.erecta
MZ620728.1_Ehrharta.erecta
MZ740271.1_Ehrharta.erecta
KX822019.1_Elymus.libanoticus
KY636117.1_Elymus.cognatus
KY636121.1_Elymus.stipifolius
KY636122.1_Elymus.stipifolius
KY636123.1_Elymus.stipifolius
KY636128.1_Elymus.tauri
KY636129.1_Elymus.tauri
KY636130.1_Elymus.tauri
KY636131.1_Elymus.tauri
MK775250.1_Elymus.sibiricus
MK775251.1_Elymus.nodosus
MK775252.1_Elymus.ciliaris
MK775254.1_Elymus.tangutorum
MN420499.1_Elymus.tangutorum
MN703669.1_Elymus.grandis
MN703670.1_Elymus.longearistatus
MN983109.1_Elymus.trachycaulus
MT089577.1_Elymus.antiquus
MT094307.1_Elymus.lolioides
MT106331.1_Elymus.hystrix
MT106332.1_Elymus.virginicus
MT385860.1_Elymus.cognatus
MT385861.1_Elymus.libanoticus
MT385862.1_Elymus.stipifolius
MT385864.1_Elymus.tauri
MT610373.1_Elymus.atratus
MT610376.1_Elymus.sibiricus
MT644142.1_Elymus.breviaristatus
MT644143.1_Elymus.submuticus
MT644146.1_Elymus.sinosubmuticus
MW752517.1_Elymus.trachycaulus
MZ169384.1_Elymus.repens
MZ337548.1_Elymus.magellanicus
KY432811.1_Enneapogon.oblongus
MK590084.1_Enneapogon.caerulescens
MW255511.1_Enneapogon.desvauxii
KT168384.1_Eragrostis.minor
KT168385.1_Eragrostis.tef
MF035981.1_Eragrostis.tef
MK590079.1_Eragrostis.setifolia
MK590080.1_Eragrostis.tenellula
MN268502.1_Eragrostis.pilosa
MN780987.1_Eragrostis.tef
MN780988.1_Eragrostis.tef
MN780989.1_Eragrostis.tef
MN780990.1_Eragrostis.tef
MN780991.1_Eragrostis.tef
MN780992.1_Eragrostis.tef
MN780993.1_Eragrostis.tef
MN780994.1_Eragrostis.tef
MN780995.1_Eragrostis.tef
MN780996.1_Eragrostis.tef
MN780997.1_Eragrostis.tef
MN780998.1_Eragrostis.tef
MN780999.1_Eragrostis.tef
MN781000.1_Eragrostis.tef
MN781001.1_Eragrostis.tef
MN781002.1_Eragrostis.tef
MN781003.1_Eragrostis.tef
MN781004.1_Eragrostis.tef
MN781005.1_Eragrostis.tef
MN781006.1_Eragrostis.tef
MN781007.1_Eragrostis.tef
MN781008.1_Eragrostis.tef
MN781009.1_Eragrostis.tef
MN781010.1_Eragrostis.tef
MN781011.1_Eragrostis.tef
MN781012.1_Eragrostis.tef
MN781013.1_Eragrostis.tef
MN781014.1_Eragrostis.tef
MN781015.1_Eragrostis.tef
MN781016.1_Eragrostis.tef
MN781017.1_Eragrostis.tef
MN781018.1_Eragrostis.tef
MW255512.1_Eragrostis.atrovirens
MW255513.1_Eragrostis.autumnalis
MW255514.1_Eragrostis.brownii
MW255515.1_Eragrostis.cilianensis
MW255516.1_Eragrostis.cylindrica
MW255517.1_Eragrostis.ferruginea
MW255518.1_Eragrostis.fractus
MW255519.1_Eragrostis.japonica
MW255520.1_Eragrostis.nevinii
MW255521.1_Eragrostis.nigra
MW255522.1_Eragrostis.perennans
MW255523.1_Eragrostis.pilosa
MW255524.1_Eragrostis.rufinerva
MW255525.1_Eragrostis.tenella
MW255526.1_Eragrostis.unioloides
OL678516.1_Eragrostis.pilosa
KY432809.1_Eremochloa.ophiuroides
KY596134.1_Eremochloa.eriopoda
KY596146.1_Eremochloa.ciliaris
MT806102.1_Eremochloa.ophiuroides
KY636089.1_Eremopyrum.bonaepartis
KY636090.1_Eremopyrum.bonaepartis
KY636091.1_Eremopyrum.bonaepartis
KY636092.1_Eremopyrum.bonaepartis
KY636093.1_Eremopyrum.bonaepartis
KY636094.1_Eremopyrum.triticeum
KY636095.1_Eremopyrum.triticeum
MH285851.1_Eremopyrum.distans
MH285852.1_Eremopyrum.triticeum
MT094305.1_Eremopyrum.orientale
MT119356.1_Eremopyrum.triticeum
KJ920231.1_Eriachne.stipacea
KX229726.1_Eriachne.armittii
MF035983.1_Eriachne.mucronata
MH036233.1_Eriachne.agrostidea
MH036234.1_Eriachne.aristidea
MH036235.1_Eriachne.aristidea
MH036236.1_Eriachne.aristidea
MH036237.1_Eriachne.armittii
MH036238.1_Eriachne.avenacea
MH036239.1_Eriachne.avenacea
MH036240.1_Eriachne.axillaris
MH036241.1_Eriachne.basedowii
MH036242.1_Eriachne.burkittii
MH036243.1_Eriachne.ciliata
MH036244.1_Eriachne.ciliata
MH036245.1_Eriachne.ciliata
MH036246.1_Eriachne.compacta
MH036247.1_Eriachne.glauca
MH036248.1_Eriachne.glauca
MH036249.1_Eriachne.glauca
MH036250.1_Eriachne.glauca
MH036251.1_Eriachne.major
MH036252.1_Eriachne.major
MH036253.1_Eriachne.melicacea
MH036254.1_Eriachne.melicacea
MH036255.1_Eriachne.melicacea
MH036256.1_Eriachne.mucronata
MH036257.1_Eriachne.nodosa
MH036258.1_Eriachne.obtusa
MH036259.1_Eriachne.obtusa
MH036260.1_Eriachne.obtusa
MH036261.1_Eriachne.obtusa
MH036262.1_Eriachne.obtusa
MH036263.1_Eriachne.obtusa
MH036264.1_Eriachne.obtusa
MH036265.1_Eriachne.obtusa
MH036266.1_Eriachne.obtusa
MH036267.1_Eriachne.pallescens
MH036268.1_Eriachne.pauciflora
MH036269.1_Eriachne.pauciflora
MH036270.1_Eriachne.pauciflora
MH036271.1_Eriachne.pauciflora
MH036272.1_Eriachne.schultziana
MH036273.1_Eriachne.schultziana
MH036274.1_Eriachne.schultziana
MH036275.1_Eriachne.schultziana
MH036276.1_Eriachne.schultziana
MH036277.1_Eriachne.semiciliata
MH036279.1_Eriachne.stipacea
MH036280.1_Eriachne.stipacea
MH036281.1_Eriachne.sulcata
MH036282.1_Eriachne.triodioides
MH036283.1_Eriachne.triodioides
MH036284.1_Eriachne.triodioides
MH036285.1_Eriachne.triodioides
MH036286.1_Eriachne.triseta
MK590078.1_Eriachne.tenuiculmis
MK193813.1_Eriocaulon.buergerianum
MK639364.1_Eriocaulon.decemflorum
MN540449.1_Eriocaulon.nepalense
MN967019.1_Eriocaulon.henryanum
KU961860.1_Eriochrysis.villosa
KU961861.1_Eriochrysis.cayennensis
KU961863.1_Eriochrysis.laxa
MH767450.1_Eriochrysis.pallida
JX513416.1_Fargesia.nitida
JX513417.1_Fargesia.spathacea
JX513418.1_Fargesia.yunnanensis
KU569968.1_Fargesia.nitida
MH988724.1_Fargesia.denudata
MH117939.1_Fargesia.qinlingensis
MH988719.1_Fargesia.decurvata
MH988720.1_Fargesia.qinlingensis
MH988721.1_Fargesia.communis
MH988723.1_Fargesia.stenoclada
MH988725.1_Fargesia.canaliculata
MH988726.1_Fargesia.fungosa
MH988727.1_Fargesia.hygrophila
MH988728.1_Fargesia.albocerea
MH988729.1_Fargesia.setosa
MH988730.1_Fargesia.funiushanensis
MH988732.1_Fargesia.daminiu
MH988734.1_Fargesia.grossa
MH988735.1_Fargesia.edulis
JX871939.1_Festuca.altissima
JX871940.1_Festuca.ovina
JX871941.1_Festuca.pratensis
MH569081.1_Festuca.ovina
MN309822.1_Festuca.brevipila
MN309823.1_Festuca.rubra
MN309824.1_Festuca.ovina
MN309825.1_Festuca.rubra
MN309826.1_Festuca.rubra
MT089571.1_Festuca.alopecuros
KY596171.1_Garnotia.thailandica
KY596184.1_Garnotia.tenella
MK593551.1_Garnotia.stricta
MK679771.1_Gigantochloa.parviflora
MK679788.1_Gigantochloa.glabrata
MK679803.1_Gigantochloa.atroviolacea
MK679804.1_Gigantochloa.nigrociliata
MK679805.1_Gigantochloa.verticillata
MN688203.1_Gigantochloa.verticillata
KM365071.1_Guadua.angustifolia
KP793062.1_Guadua.weberbaueri
KT373814.1_Guadua.chacoensis
KY596142.1_Heteropogon.triticeus
KY596145.1_Heteropogon.contortus
KY596153.1_Heteropogon.triticeus
KY596159.1_Heteropogon.triticeus
KY596176.1_Heteropogon.triticeus
KY707769.1_Heteropogon.triticeus
MT504972.1_Heteropogon.contortus
MT504973.1_Heteropogon.contortus
MT504974.1_Heteropogon.contortus
MT504975.1_Heteropogon.contortus
MT504976.1_Heteropogon.contortus
MT504977.1_Heteropogon.contortus
MT504978.1_Heteropogon.contortus
MT504979.1_Heteropogon.contortus
MT504980.1_Heteropogon.contortus
MT504981.1_Heteropogon.contortus
MT504982.1_Heteropogon.contortus
MT504983.1_Heteropogon.contortus
MT504984.1_Heteropogon.contortus
MT504985.1_Heteropogon.contortus
MT504986.1_Heteropogon.contortus
MT504987.1_Heteropogon.contortus
MT504988.1_Heteropogon.contortus
MT504989.1_Heteropogon.contortus
MT504990.1_Heteropogon.contortus
MT504991.1_Heteropogon.contortus
MT504992.1_Heteropogon.contortus
MT504993.1_Heteropogon.contortus
MT504994.1_Heteropogon.fischerianus
MT504995.1_Heteropogon.melanocarpus
MT504996.1_Heteropogon.melanocarpus
MT504997.1_Heteropogon.ritchiei
EF115541.1_Hordeum.vulgare
KC912687.1_Hordeum.vulgare
KC912688.1_Hordeum.vulgare
KC912689.1_Hordeum.vulgare
KM974741.1_Hordeum.jubatum
KT962228.1_Hordeum.vulgare
KY636105.1_Hordeum.bulbosum
KY636106.1_Hordeum.marinum
KY636107.1_Hordeum.murinum
KY636108.1_Hordeum.pubiflorum
KY636109.1_Hordeum.vulgare
KY636110.1_Hordeum.vulgare
MH331641.1_Hordeum.bogdanii
MN171376.1_Hordeum.vulgare
MN171377.1_Hordeum.vulgare
MN171378.1_Hordeum.vulgare
MN171379.1_Hordeum.vulgare
MN171380.1_Hordeum.vulgare
MN171381.1_Hordeum.vulgare
MN171382.1_Hordeum.vulgare
MN171383.1_Hordeum.vulgare
MN171384.1_Hordeum.vulgare
MN171385.1_Hordeum.vulgare
MN171386.1_Hordeum.vulgare
MN171387.1_Hordeum.vulgare
MN171388.1_Hordeum.vulgare
MN171389.1_Hordeum.vulgare
MN171390.1_Hordeum.vulgare
MN171391.1_Hordeum.vulgare
MN171392.1_Hordeum.vulgare
MT274429.1_Hordeum.brevisubulatum
MT277093.1_Hordeum.brevisubulatum
MT386010.1_Hordeum.brevisubulatum
MT568766.1_Hordeum.brevisubulatum
MW017635.1_Hordeum.vulgare
MW531730.1_Hordeum.vulgare
MW531731.1_Hordeum.vulgare
KU291500.1_Hyparrhenia.subplumosa
KY596119.1_Hyparrhenia.rufa
KY596156.1_Hyparrhenia.rufa
KY596163.1_Hyparrhenia.diplandra
MH181164.1_Hyparrhenia.rudis
MH181167.1_Hyparrhenia.violascens
MH181169.1_Hyparrhenia.dichroa
MH181179.1_Hyparrhenia.papillipes
MH181190.1_Hyparrhenia.bagirmica
MH181192.1_Hyparrhenia.dichroa
MH181195.1_Hyparrhenia.mobukensis
MH181199.1_Hyparrhenia.anemopaegma
MH181202.1_Hyparrhenia.variabilis
MH181220.1_Hyparrhenia.figariana
MH181226.1_Hyparrhenia.umbrosa
MH181229.1_Hyparrhenia.newtonii
MT610042.1_Hyparrhenia.hirta
MT610097.1_Hyparrhenia.rufa
HQ337795.1_Indocalamus.longiauritus
JX513421.1_Indocalamus.wilsonii
MF066250.1_Indocalamus.sinicus
JX513422.1_Indosasa.sinica
MF066251.1_Indosasa.shibataeoides
MH394379.1_Indosasa.sinica
MH394380.1_Indosasa.sinica
MH394381.1_Indosasa.sinica
MH394382.1_Indosasa.sinica
MN917206.1_Indosasa.gigantea
MW463058.1_Indosasa.hispida
KU291468.1_Iseilema.macratherum
MK593554.1_Iseilema.membranaceum
MT504998.1_Iseilema.anthephoroides
MT504999.1_Iseilema.hubbardii
MT505000.1_Iseilema.laxum
MT505001.1_Iseilema.membranaceum
MT505002.1_Iseilema.prostratum
MT505003.1_Iseilema.vaginiflorum
MH569082.1_Kengyilia.melanthera
MK775255.1_Kengyilia.batalinii
MN703658.1_Kengyilia.alatavica
MN703659.1_Kengyilia.hirsuta
MN703660.1_Kengyilia.kokonorica
MN703661.1_Kengyilia.mutica
MN703662.1_Kengyilia.thoroldiana
MN703663.1_Kengyilia.stenachyra
MN703664.1_Kengyilia.grandiglumis
MN703665.1_Kengyilia.rigidula
MN703666.1_Kengyilia.laxiflora
MN703667.1_Kengyilia.melanthera
MZ353655.1_Kengyilia.hirsuta
MZ353656.1_Kengyilia.grandiglumis
JN415112.1_Leersia.tisserantii
KF359922.1_Leersia.japonica
KY347906.1_Leersia.perrieri
MF508719.1_Leersia.perrieri
MT726936.1_Leersia.perrieri
MH707612.1_Leymus.chinensis
MK775256.1_Leymus.arenarius
MK775257.1_Leymus.secalinus
MK775258.1_Leymus.chinensis
MT089568.1_Leymus.paboanus
MT106325.1_Leymus.komarovii
MT106326.1_Leymus.triticoides
MT106327.1_Leymus.multicaulis
MT106328.1_Leymus.coreanus
MT106329.1_Leymus.racemosus
MT106330.1_Leymus.duthiei
MF614917.1_Littledalea.racemosa
MG463107.1_Littledalea.przevalskyi
MG570144.1_Littledalea.alaica
MW218960.1_Littledalea.tibetica
AM777385.2_Lolium.perenne
FJ466687.2_Lolium.arundinaceum
JX871942.1_Lolium.multiflorum
KM974751.1_Lolium.arundinaceum
KM974742.1_Melica.mutica
KM974743.1_Melica.subulata
MN091803.1_Melica.scabrosa
MK679766.1_Melocalamus.arrectus
MK679793.1_Melocalamus.compactiflorus
BK010673.1_Miscanthus.sinensis
BK010674.1_Miscanthus.sacchariflorus
BK010675.1_Miscanthus.floridulus
KR822687.1_Miscanthus.sacchariflorus
KR822688.1_Miscanthus.sinensis
LC160131.1_Miscanthus.sinensis
LN869215.1_Miscanthus.floridulus
LN869216.1_Miscanthus.junceus
LN869217.1_Miscanthus.sacchariflorus
LN869218.1_Miscanthus.sacchariflorus
LN869219.1_Miscanthus.sacchariflorus
LN869220.1_Miscanthus.sinensis
LN869221.1_Miscanthus.sinensis
LN869222.1_Miscanthus.sinensis
LN869223.1_Miscanthus.sinensis
LN869224.1_Miscanthus.sinensis
LN869225.1_Miscanthus.sinensis
LN869226.1_Miscanthus.sinensis
LN869227.1_Miscanthus.sinensis
LN869228.1_Miscanthus.sinensis
LN869229.1_Miscanthus.transmorrisonensis
LN869230.1_Miscanthus.x.giganteus
LN896358.1_Miscanthus.sinensis
LS398101.1_Miscanthus.sinensis
LS398102.1_Miscanthus.oligostachyus
LS974680.1_Miscanthus.capensis
LS974682.1_Miscanthus.capensis
LS975134.1_Miscanthus.sacchariflorus
LS975135.1_Miscanthus.floridulus
LS975137.1_Miscanthus.transmorrisonensis
MT610066.1_Miscanthus.ecklonii
KY596162.1_Mnesithea.helferi
MT610052.1_Mnesithea.selloana
MT610073.1_Mnesithea.formosa
MT610086.1_Mnesithea.lepidura
KX792500.2_Nassella.trichotoma
KY432788.1_Nassella.hyalina
MF480752.1_Nassella.neesiana
MF480753.1_Nassella.hyalina
KU569972.1_Oldeania.alpina
MF066243.1_Oldeania.alpina
MF066247.1_Oldeania.humbertii
MF066248.1_Oldeania.humbertii
MF066249.1_Oldeania.ibityensis
MF066252.1_Oldeania.itremoensis
MF066254.1_Oldeania.cf..madagascariensis.PFM-2018
MK622399.1_Orinus.kokonoricus
MW133235.1_Orinus.kokonoricus
MW057690.1_Orinus.thoroldii
MW186709.1_Orinus.intermedius
AP006728.1_Oryza.nivara
AY522329.1_Oryza.sativa
AY522330.1_Oryza.sativa
AY522331.1_Oryza.sativa
GU592207.1_Oryza.sativa
GU592208.1_Oryza.meridionalis
GU592209.1_Oryza.australiensis
HG998308.1_Oryza.sativa
HG998309.1_Oryza.sativa
HG998310.1_Oryza.sativa
HG998361.1_Oryza.sativa
HG998362.1_Oryza.sativa
HG998363.1_Oryza.sativa
HG998364.1_Oryza.sativa
HG998365.1_Oryza.sativa
HG998366.1_Oryza.sativa
HG998367.1_Oryza.sativa
HG998368.1_Oryza.sativa
HG998369.1_Oryza.sativa
HG998370.1_Oryza.sativa
HG998371.1_Oryza.sativa
HG998372.1_Oryza.sativa
HG998373.1_Oryza.sativa
HG998374.1_Oryza.sativa
HG998375.1_Oryza.sativa
HG998376.1_Oryza.sativa
HG998377.1_Oryza.sativa
HG998378.1_Oryza.sativa
HG998379.1_Oryza.sativa
HG998380.1_Oryza.sativa
HG998507.1_Oryza.meridionalis
HG998508.1_Oryza.rufipogon
HG998509.1_Oryza.rufipogon
HG998510.1_Oryza.rufipogon
HG998511.1_Oryza.meridionalis
HG998512.1_Oryza.rufipogon
HG998525.1_Oryza.meridionalis
HG998535.1_Oryza.rufipogon
HG998536.1_Oryza.rufipogon
HG998537.1_Oryza.barthii
JN005831.1_Oryza.meridionalis
JN005832.1_Oryza.rufipogon
JN005833.1_Oryza.rufipogon
JN861109.1_Oryza.sativa
JN861110.1_Oryza.sativa
KF359901.1_Oryza.nivara
KF359902.1_Oryza.rufipogon
KF359903.1_Oryza.glaberrima
KF359904.1_Oryza.barthii
KF359905.1_Oryza.glumipatula
KF359906.1_Oryza.meridionalis
KF359907.1_Oryza.longistaminata
KF359908.1_Oryza.punctata
KF359909.1_Oryza.minuta
KF359910.1_Oryza.officinalis
KF359911.1_Oryza.rhizomatis
KF359912.1_Oryza.eichingeri
KF359913.1_Oryza.alta
KF359914.1_Oryza.grandiglumis
KF359915.1_Oryza.latifolia
KF359916.1_Oryza.australiensis
KF359917.1_Oryza.brachyantha
KF359918.1_Oryza.longiglumis
KF359919.1_Oryza.ridleyi
KF359920.1_Oryza.meyeriana
KF359921.1_Oryza.meyeriana
KF428978.1_Oryza.rufipogon
KF562709.1_Oryza.rufipogon
KJ513090.1_Oryza.glaberrima
KJ830774.1_Oryza.australiensis
KM088016.1_Oryza.sativa
KM088017.1_Oryza.sativa
KM088021.1_Oryza.glaberrima
KM088022.1_Oryza.nivara
KM088023.1_Oryza.barthii
KM088024.1_Oryza.longistaminata
KM103367.1_Oryza.sativa
KM103368.1_Oryza.sativa
KM103369.1_Oryza.sativa
KM103370.1_Oryza.glaberrima
KM103371.1_Oryza.barthii
KM103372.1_Oryza.rufipogon
KM103373.1_Oryza.meridionalis
KM103374.1_Oryza.glumipatula
KM103375.1_Oryza.punctata
KM103377.1_Oryza.glaberrima
KM103378.1_Oryza.barthii
KM103379.1_Oryza.barthii
KM103380.1_Oryza.barthii
KM103381.1_Oryza.barthii
KM103382.1_Oryza.sativa
KM881634.1_Oryza.barthii
KM881635.1_Oryza.barthii
KM881636.1_Oryza.barthii
KM881637.1_Oryza.barthii
KM881638.1_Oryza.glaberrima
KM881639.1_Oryza.glaberrima
KM881640.1_Oryza.glumipatula
KM881641.1_Oryza.longistaminata
KM881642.1_Oryza.longistaminata
KM881643.1_Oryza.officinalis
KP878280.1_Oryza.sativa
KR364802.1_Oryza.glumipatula
KR364803.1_Oryza.glumipatula
KT289403.1_Oryza.sativa
KT289404.1_Oryza.sativa
KT992850.1_Oryza.brachyantha
KU179220.1_Oryza.minuta
KU705873.1_Oryza.sativa
KX085496.1_Oryza.eichingeri
KX085497.1_Oryza.rhizomatis
KY780370.1_Oryza.sativa
LC642244.1_Oryza.nivara
LC666910.1_Oryza.nivara
MF401450.1_Oryza.eichingeri
MF401451.1_Oryza.latifolia
MF401452.1_Oryza.rhizomatis
MF401453.1_Oryza.meyeriana
MG252500.1_Oryza.sativa
MG383937.1_Oryza.coarctata
MK348618.1_Oryza.sativa
MT653617.1_Oryza.sativa
MT712789.1_Oryza.nivara
MT726926.1_Oryza.neocaledonica
MT726927.1_Oryza.schlechteri
MT726928.1_Oryza.grandiglumis
MT726929.1_Oryza.australiensis
MT726930.1_Oryza.officinalis
MT726931.1_Oryza.coarctata
MT726932.1_Oryza.punctata
MT726933.1_Oryza.longiglumis
MT726934.1_Oryza.alta
MT726935.1_Oryza.malampuzhaensis
MT726937.1_Oryza.ridleyi
MT726938.1_Oryza.minuta
MT726939.1_Oryza.brachyantha
MT731950.1_Oryza.alta
MW001303.1_Oryza.sativa
MW711321.1_Oryza.rufipogon
MW711322.1_Oryza.rufipogon
MZ151337.1_Oryza.glaberrima
MZ424305.1_Oryza.sativa
OV049797.1_Oryza.rufipogon
OV049798.1_Oryza.rufipogon
OV049799.1_Oryza.rufipogon
OV049800.1_Oryza.rufipogon
OV049801.1_Oryza.rufipogon
OV049802.1_Oryza.rufipogon
OV049803.1_Oryza.rufipogon
OV049804.1_Oryza.rufipogon
OV049805.1_Oryza.rufipogon
OV049806.1_Oryza.rufipogon
OV049840.1_Oryza.rufipogon
OV049841.1_Oryza.meridionalis
OV049851.1_Oryza.glaberrima
OV049911.1_Oryza.barthii
OV049914.1_Oryza.rufipogon
OV049915.1_Oryza.rufipogon
OV049916.1_Oryza.rufipogon
OV049917.1_Oryza.rufipogon
OV049918.1_Oryza.rufipogon
OV049919.1_Oryza.sativa
OV049920.1_Oryza.rufipogon
OV049921.1_Oryza.rufipogon
OV049922.1_Oryza.rufipogon
OV049923.1_Oryza.rufipogon
OV049929.1_Oryza.barthii
OV049930.1_Oryza.rufipogon
OV049931.1_Oryza.barthii
OV049932.1_Oryza.rufipogon
OV049933.1_Oryza.barthii
OV049934.1_Oryza.barthii
OV049935.1_Oryza.rufipogon
OV049986.1_Oryza.meridionalis
OV049987.1_Oryza.rufipogon
OV049988.1_Oryza.rufipogon
OV049989.1_Oryza.rufipogon
OV049990.1_Oryza.rufipogon
OV049991.1_Oryza.rufipogon
OV049992.1_Oryza.rufipogon
OV049993.1_Oryza.rufipogon
OV049994.1_Oryza.rufipogon
OV049995.1_Oryza.rufipogon
OV049996.1_Oryza.rufipogon
OV049997.1_Oryza.rufipogon
OV049998.1_Oryza.meridionalis
OV049999.1_Oryza.meridionalis
OV050000.1_Oryza.rufipogon
OV050001.1_Oryza.meridionalis
X15901.1_Oryza.sativa
CM009689.1_Panicum.miliaceum
HQ731441.1_Panicum.virgatum
HQ822121.1_Panicum.virgatum
KU291475.1_Panicum.capillare
KU343177.1_Panicum.miliaceum
KX756177.1_Panicum.sumatrense
MF563372.1_Panicum.leptolomoides
MF563373.1_Panicum.pygmaeum
MF563374.1_Panicum.lycopodioides
MH394348.1_Panicum.incomtum
MH394349.1_Panicum.incomtum
MH394350.1_Panicum.incomtum
MH394351.1_Panicum.incomtum
MT083944.1_Panicum.coloratum
MT083945.1_Panicum.hallii
PQIB02001306.1_Panicum.miliaceum
KU291477.1_Paspalum.dilatatum
KU291478.1_Paspalum.fimbriatum
KU291479.1_Paspalum.glaziovii
MF563367.1_Paspalum.paniculatum
MG523994.1_Paspalum.juergensii
MG523995.1_Paspalum.minus
MG523996.1_Paspalum.pubiflorum
MG523997.1_Paspalum.simplex
MG523998.1_Paspalum.vaginatum
MG523999.1_Paspalum.virgatum
MG524001.1_Paspalum.inaequivalve
MG524002.1_Paspalum.ionanthum
MK593559.1_Paspalum.vaginatum
MT083946.1_Paspalum.atratum
MT094441.1_Paspalum.floridanum
MT094442.1_Paspalum.laeve
MT094443.1_Paspalum.millegrana
MT094444.1_Paspalum.notatum
MT094445.1_Paspalum.setaceum
MT120331.1_Paspalum.nicorae
MT457745.1_Paspalum.pauciciliatum
MT472620.1_Paspalum.lividum
MT610075.1_Paspalum.malacophyllum
MT732565.1_Paspalum.plicatulum
KM974746.1_Phalaris.arundinacea
MT094323.1_Phalaris.coerulescens
MT274594.1_Phalaris.arundinacea
MT274595.1_Phalaris.arundinacea
MT274596.1_Phalaris.aquatica
NC059981.1_Phalaris.coerulescens
HQ154129.1_Phyllostachys.nigra
HQ337796.1_Phyllostachys.edulis
JN415113.1_Phyllostachys.propinqua
KJ722540.1_Phyllostachys.sulphurea
KU569973.1_Phyllostachys.aurea
KY038820.1_Phyllostachys.edulis
LC589449.1_Phyllostachys.angusta
MN537808.1_Phyllostachys.reticulata
MN537809.1_Phyllostachys.edulis
MT657329.1_Phyllostachys.glauca
LC590826.1_Phyllostachys.nidularia
MT937193.1_Phyllostachys.nidularia
MW281074.1_Phyllostachys.nidularia
MT939905.1_Phyllostachys.heteroclada
MW075109.1_Phyllostachys.heteroclada
MW007169.1_Phyllostachys.edulis
MW007170.1_Phyllostachys.edulis
MW027348.1_Phyllostachys.angusta
HQ154129.1_Phyllostachys.nigra
HQ337796.1_Phyllostachys.edulis
JN415113.1_Phyllostachys.propinqua
KJ722540.1_Phyllostachys.sulphurea
KU569973.1_Phyllostachys.aurea
KY038820.1_Phyllostachys.edulis
LC589449.1_Phyllostachys.angusta
MN537808.1_Phyllostachys.reticulata
MN537809.1_Phyllostachys.edulis
MT657329.1_Phyllostachys.glauca
LC590826.1_Phyllostachys.nidularia
MT937193.1_Phyllostachys.nidularia
MW281074.1_Phyllostachys.nidularia
MT939905.1_Phyllostachys.heteroclada
MW075109.1_Phyllostachys.heteroclada
MW007169.1_Phyllostachys.edulis
MW007170.1_Phyllostachys.edulis
MW027348.1_Phyllostachys.angusta
KM974749.1_Poa.palustris
KY562592.1_Poa.nemoralis
KY562593.1_Poa.trivialis
MK116524.1_Poa.crymophila
MN551181.1_Poa.poophagorum
MN551182.1_Poa.pratensis
MN608157.1_Poa.pagophila
MN608159.1_Poa.pratensis
MN608160.1_Poa.sphondylodes
MN608161.1_Poa.sinoglauca
MN608163.1_Poa.megalothyrsa
MN608164.1_Poa.paucifolia
MN608165.1_Poa.crymophila
MN608166.1_Poa.malaca
MN608167.1_Poa.elanata
MN608168.1_Poa.orinosa
MN983113.1_Poa.alsodes
MN983114.1_Poa.saltuensis
MN983115.1_Poa.wolfii
MT094306.1_Poa.diaphora
MT094326.1_Poa.saltuensis
MT295102.1_Poa.pratensis
KY636118.1_Pseudoroegneria.spicata
KY636119.1_Pseudoroegneria.spicata
MH285855.1_Pseudoroegneria.spicata
MT094328.1_Pseudoroegneria.gracillima
MT385863.1_Pseudoroegneria.strigosa
KT428377.1_Pseudosasa.japonica
KT428378.1_Pseudosasa.japonica
MF066255.1_Pseudosasa.cantorii
MZ153211.1_Pseudosasa.usawai
MN563797.1_Puya_mirabilis
MZ403751.1_Puya_hamata
OL639018.1_Puya_nitida
OL639019.1_Puya_macrura
OL639020.1_Puya_raimondii
OL639021.1_Puya_raimondii
OL639022.1_Puya_santosii
OL639023.1_Puya_goudotiana
OL639024.1_Puya_ferruginea
OL639025.1_Puya_macrura
OL639026.1_Puya_hutchisonii
OL639027.1_Puya_macropoda
OL639028.1_Puya_macropoda
BK010676.1_Saccharum.spontaneum
KX139746.1_Saccharum.spontaneum
LN849912.1_Saccharum.spontaneum
LN849913.1_Saccharum.officinarum
LN896360.1_Saccharum.spontaneum
LS974679.1_Saccharum.rufipilum
LS974681.1_Saccharum.spontaneum
LS975122.1_Saccharum.spontaneum
LS975126.1_Saccharum.spontaneum
LS975128.1_Saccharum.spontaneum
LS975130.1_Saccharum.spontaneum
LS975131.1_Saccharum.spontaneum
LS975136.1_Saccharum.spontaneum
LS975138.1_Saccharum.spontaneum
MF140336.1_Saccharum.officinarum
MF563371.1_Saccharum.hildebrandtii
MG685915.1_Saccharum.officinarum
MN204507.1_Saccharum.officinarum
MN204508.1_Saccharum.spontaneum
MN342163.1_Saccharum.perrieri
MT721155.1_Saccharum.spontaneum
MZ328080.1_Saccharum.officinarum
KJ819549.1_Sartidia.perrieri
KJ819550.1_Sartidia.dewinteri
MF563370.1_Sartidia.isaloensis
KY596122.1_Schizachyrium.brevifolium
KY596124.1_Schizachyrium.sanguineum
KY596135.1_Schizachyrium.brevifolium
KY596137.1_Schizachyrium.sanguineum
KY596140.1_Schizachyrium.sanguineum
KY596141.1_Schizachyrium.sanguineum
KY596147.1_Schizachyrium.exile
KY596150.1_Schizachyrium.brevifolium
KY596151.1_Schizachyrium.brevifolium
KY596154.1_Schizachyrium.scoparium
KY596165.1_Schizachyrium.sanguineum
KY596166.1_Schizachyrium.spicatum
KY596168.1_Schizachyrium.brevifolium
KY596172.1_Schizachyrium.tenerum
KY596174.1_Schizachyrium.imberbe
KY596181.1_Schizachyrium.sanguineum
MF170217.1_Schizachyrium.scoparium
MH181183.1_Schizachyrium.ursulus
MH181189.1_Schizachyrium.thollonii
MH181201.1_Schizachyrium.lomaense
MH181205.1_Schizachyrium.cubense
MH181207.1_Schizachyrium.spicatum
MH181208.1_Schizachyrium.salzmannii
MH181209.1_Schizachyrium.spicatum
MH181219.1_Schizachyrium.exile
MH181227.1_Schizachyrium.djalonicum
MH181228.1_Schizachyrium.claudopus
MH181233.1_Schizachyrium.microstachyum
MH181234.1_Schizachyrium.microstachyum
MH181235.1_Schizachyrium.cirratum
MH185800.1_Schizachyrium.delavayi
MT504969.1_Schizachyrium.delavayi
MT942632.1_Schizachyrium.sanguineum
KC912691.1_Secale.cereale
KY636132.1_Secale.cereale
KY636133.1_Secale.cereale
KY636134.1_Secale.cereale
KY636135.1_Secale.cereale
KY636136.1_Secale.cereale
KY636137.1_Secale.strictum
KY636138.1_Secale.strictum
LC645210.1_Secale.strictum
LC645358.1_Secale.cereale
LC649171.1_Secale.sylvestre
MW557517.1_Secale.sylvestre
KF646538.1_Setaria.italica
KJ001642.1_Setaria.italica
KT289405.1_Setaria.viridis
KU291476.1_Setaria.geminata
MK348603.1_Setaria.italica
MK348604.1_Setaria.italica
MK348605.1_Setaria.italica
MK348609.1_Setaria.italica
EF115542.1_Sorghum.bicolor
KF998272.1_Sorghum.timorense
KY596132.1_Sorghum.mekongense
KY596136.1_Sorghum.mekongense
LS398103.1_Sorghum.arundinaceum
LS398104.1_Sorghum.versicolor
LS398105.1_Sorghum.halepense
LS398106.1_Sorghum.bicolor
LS398107.1_Sorghum.timorense
LS423604.1_Sorghum.propinquum
MH926027.1_Sorghum.propinquum
MH926028.1_Sorghum.bicolor
MK348612.1_Sorghum.bicolor
MT333845.1_Sorghum.bicolor
MT333846.1_Sorghum.bicolor
MT333847.1_Sorghum.bicolor
MT333848.1_Sorghum.bicolor
MT459453.1_Sorghum.bicolor
MT610082.1_Sorghum.sorghoides
MW999225.1_Sorghum.bicolor
MK182317.1_Sparganium.eurycarpum
MK460210.1_Sparganium.stoloniferum
MW583115.1_Sparganium.fallax
MW829761.1_Sparganium.eurycarpum
MW829762.1_Sparganium.japonicum
MW829763.1_Sparganium.natans
MW829764.1_Sparganium.stoloniferum
MW829765.1_Sparganium.stoloniferum
MW829766.1_Sparganium.subglobosum
MW829767.1_Sparganium.acaule
MW829768.1_Sparganium.eurycarpum
MW874418.1_Sparganium.fallax
MZ681495.1_Sparganium.glomeratum
MZ981724.1_Sparganium.angustifolium
KP176438.1_Sporobolus.maritimus
KT168388.1_Sporobolus.michauxianus
KT168389.1_Sporobolus.heterolepis
MH392303.1_Sporobolus.helvolus
MT311317.1_Sporobolus.alterniflorus
MG052614.1_Stipa.alaica
MG052596.1_Stipa.arabica
MT850060_Stipa.arabica
MT850061_Stipa.austroaltaica
MT850079_Stipa.basiplumosa
MG052597.1_Stipa.borysthenica
MT850062_Stipa.breviflora
MG052599.1_Stipa.capillata
MG052598.1_Stipa.capillata
MT850063_Stipa.caucasica
MG052602.1_Stipa.glareosa
MG052600.1_Stipa.caucasica
MG052601.1_Stipa.caucasica
MT850065_Stipa.ehrenbergiana
MT850066_Stipa.eriocaulis
MH918066.1_Stipa.heptapotamica
MH918067.1_Stipa.heptapotamica
MH918068.1_Stipa.heptapotamica
MH918069.1_Stipa.heptapotamica
MG052603.1_Stipa.hohenackeriana
MT850067_Stipa.klimesii
MG052605_Stipa.lessingiana
MH918070.1_Stipa.lessingiana
MH918071.1_Stipa.lessingiana
MH918072.1_Stipa.lessingiana
MT850068_Stipa.lipskyi
MT850069_Stipa.lipskyi
NC028444,1_Stipa.lipskyi
MT850070_Stipa.macroglossa
MG052606.1_Stipa.magnifica
MG052607.1_Stipa.narynica
MG052608.1_Stipa.orientalis
MG052609.1_Stipa.ovczinnikovii
MT850071_Stipa.penicillata
MG052610.1_Stipa.pennata
MG052611.1_Stipa.pennata
MT850072_Stipa.pennata
MT850073_Stipa.przewalskyi
MT850074_Stipa.pulcherrima
MT850075_Stipa.purpurea
MT850076_Stipa.purpurea
NC029390.1_Stipa.purpurea
MH918072.1_Stipa.richteriana
MH918073.1_Stipa.richteriana
MH918074.1_Stipa.richteriana
MH918075.1_Stipa.richteriana
MH918076.1_Stipa.richteriana
MH918077.1_Stipa.richteriana
MG052612.1_Stipa.richteriana
MG052613.1_Stipa.tianschanica
MT850077_Stipa.tzveleviana
MG052615.1_Stipa.brevicallosa
MG052616.1_Stipa.zalesskii
KY596123.1_Themeda.arundinacea
KY596125.1_Themeda.triandra
KY596129.1_Themeda.arguens
KY596131.1_Themeda.villosa
KY707767.1_Themeda.triandra
KY707770.1_Themeda.triandra
KY707771.1_Themeda.triandra
KY707772.1_Themeda.triandra
KY707773.1_Themeda.quadrivalvis
MT505005.1_Themeda.anathera
MT505006.1_Themeda.arguens
MT505007.1_Themeda.cymbaria
MT505008.1_Themeda.huttonensis
MT505009.1_Themeda.minor
MT505010.1_Themeda.mooneyi
MT505011.1_Themeda.strigosa
MT505012.1_Themeda.tremula
MT505013.1_Themeda.triandra
MT505014.1_Themeda.triandra
MT505015.1_Themeda.triandra
MT505016.1_Themeda.triandra
MT505017.1_Themeda.triandra
MT505018.1_Themeda.triandra
MT505019.1_Themeda.triandra
MT505020.1_Themeda.triandra
KY636145.1_Thinopyrum.bessarabicum
KY636146.1_Thinopyrum.distichum
MH331639.1_Thinopyrum.bessarabicum
MH331643.1_Thinopyrum.elongatum
MK775253.1_Thinopyrum.pycnanthum
MN418900.1_Thinopyrum.intermedium
MN418901.1_Thinopyrum.obtusiflorum
MT089570.1_Thinopyrum.pycnanthum
MW888707.1_Thinopyrum.elongatum
KY293680.1_Tillandsia.usneoides
MW415432.1_Tillandsia.marconae
MW442081.1_Tillandsia.espinosae
MW442082.1_Tillandsia.malzinei
MW442083.1_Tillandsia.purpurea
MW442084.1_Tillandsia.usneoides
MZ676663.1_Tillandsia.landbeckii
MF460970.1_Triodia.stipoides
MF460975.1_Triodia.wiseana
MK622400.1_Triodia.basedowii
MK622401.1_Triodia.chichesterensis
MK622402.1_Triodia.concinna
MK622403.1_Triodia.glabra
MK622404.1_Triodia.longiceps
MK622405.1_Triodia.mallota
MK622406.1_Triodia.plurinervata
MK622407.1_Triodia.rigidissima
MK622408.1_Triodia.tomentosa
MK622409.1_Triodia.vanleeuwenii
MK622410.1_Triodia.schinzii
MK622411.1_Triodia.scintillans
MK622412.1_Triodia.wiseana
MK622413.1_Triodia.lanigera
LC160130.1_Tripidium.arundinaceum
LS974674.1_Tripidium.kanashiroi
LS974675.1_Tripidium.arundinaceum
LS974676.1_Tripidium.arundinaceum
LS974677.1_Tripidium.procerum
LS974678.1_Tripidium.ravennae
LS975133.1_Tripidium.arundinaceum
MH767451.1_Tripidium.ravennae
LT996892.1_Tripsacum.dactyloides
LT996893.1_Tripsacum.dactyloides
MG386499.1_Tripsacum.dactyloides
MT610060.1_Tripsacum.peruvianum
MT610064.1_Tripsacum.pilosum
MT610068.1_Tripsacum.cundinamarcae
MT610071.1_Tripsacum.andersonii
MT610084.1_Tripsacum.dactyloides
MT610096.1_Tripsacum.australe
MW387499.1_Tripsacum.laxum
AB042240.3_Triticum.aestivum
AB976560.1_Triticum.timopheevii
CM022232.1_Triticum.aestivum
KC912690.1_Triticum.monococcum
LC005977.1_Triticum.monococcum
KC912692.1_Triticum.monococcum
KC912693.1_Triticum.urartu
KC912694.1_Triticum.aestivum
KJ174105.1_Triticum.urartu
KJ592713.1_Triticum.aestivum
KJ614396.1_Triticum.aestivum
KJ614397.1_Triticum.turgidum
KJ614398.1_Triticum.turgidum
KJ614399.1_Triticum.turgidum
KJ614400.1_Triticum.turgidum
KJ614401.1_Triticum.turgidum
KJ614402.1_Triticum.turgidum
KJ614403.1_Triticum.aestivum
KJ614407.1_Triticum.timopheevii
KJ614408.1_Triticum.timopheevii
KJ614409.1_Triticum.timopheevii
KJ614410.1_Triticum.timopheevii
KJ614411.1_Triticum.urartu
KM352501.1_Triticum.turgidum
KX631429.1_Triticum.aestivum
LC005978.1_Triticum.macha
LC372826.1_Triticum.macha
LC373211.1_Triticum.macha
LC374397.1_Triticum.macha
LC375229.1_Triticum.turgidum
LC375535.1_Triticum.carthlicum
LC375536.1_Triticum.macha
LC375773.1_Triticum.macha
LC376795.1_Triticum.carthlicum
LC377169.1_Triticum.aestivum
LC377262.1_Triticum.turgidum
LC621194.1_Triticum.aestivum
LC621195.1_Triticum.aestivum
LC621349.1_Triticum.aestivum
LC621350.1_Triticum.aestivum
LC622404.1_Triticum.aestivum
LC622405.1_Triticum.aestivum
LC623764.1_Triticum.compactum
LC623765.1_Triticum.sphaerococcum
LC623766.1_Triticum.compactum
LC625352.1_Triticum.spelta
LC625353.1_Triticum.spelta
LC625865.1_Triticum.aestivum
LC625866.1_Triticum.spelta
LC655225.1_Triticum.zhukovskyi
LC655300.1_Triticum.timopheevii
MG958545.1_Triticum.turgidum
MG958546.1_Triticum.timopheevii
MG958551.1_Triticum.monococcum
MG958550.1_Triticum.turgidum
MG958552.1_Triticum.turgidum
NC024814.1_Triticum.turgidum
MG958554.1_Triticum.aestivum
MG958555.1_Triticum.urartu
MG958556.1_Triticum.aestivum
MG958557.1_Triticum.zhukovskyi
MG958558.1_Triticum.monococcum
MG958559.1_Triticum.timopheevii
MH051715.1_Triticum.aestivum
MK253668.1_Triticum.turgidum
MN605257.1_Triticum.aestivum
MN605258.1_Triticum.aestivum
MW548259.1_Triticum.aestivum
MW548260.1_Triticum.aestivum
MW575926.1_Triticum.aestivum
MW648991.1_Triticum.aestivum
MZ230675.1_Triticum.sphaerococcum
KR232941.1_Urochloa.decumbens
KR232942.1_Urochloa.brizantha
KR232943.1_Urochloa.ruziziensis
KU291486.1_Urochloa.reptans
JX513426.1_Yushania.levigata
MH988737.1_Yushania.confusa
MH988738.1_Yushania.brevipaniculata
MH988739.1_Yushania.violascens
MH988740.1_Yushania.glandulosa
MN310560.1_Yushania.niitakayamensis
AY928077.1_Zea.mays
CM025452.1_Zea.mays
KF241980.1_Zea.mays
KF241981.1_Zea.mays
KP966114.1_Zea.mays
KP966115.1_Zea.mays
KP966116.1_Zea.mays
KP966117.1_Zea.mays
KR873421.1_Zea.diploperennis
KR873422.1_Zea.mays
KR873423.1_Zea.perennis
KR873424.1_Zea.luxurians
KU291447.1_Zea.nicaraguensis
MK348606.1_Zea.mays
MT610091.1_Zea.diploperennis
MT721151.1_Zea.mays
X86563.2_Zea.mays
AP014937.1_Zoysia.matrella
KT168390.1_Zoysia.macrantha
MF953592.2_Zoysia.japonica
MF967579.1_Zoysia.sinica
MF967580.1_Zoysia.tenuifolia
MF967581.1_Zoysia.macrostachya
MT983887.1_Zoysia.matrella
MW690657.1_Zoysia.japonica
MZ233426.1_Zoysia.macrostachya
